# Supplementary material
Source: publisher site journal article supplement (http://www.degruyter.com/publication/journal_key/HTMP/downloadAsset/HTMP_CFP%20Materials%20and%20Nanomaterials%20with%20Cooperation%20of%20the%20Sciknowledge%20Team.pdf)
Supplement: Supplementary file 1 [file HTMP_CFP%20Materials%20and%20Nanomaterials%20with%20Cooperation%20of%20the%20Sciknowledge%20Team.pdf]

## SPECIAL ISSUE ON MATERIALS AND NANOMATERIALS WITH COOPERATION OF THE SCIKNOWLEDGE TEAM

### GUEST EDITORS

---

**Prof. Ilaria Cacciotti**, Engineering Department, University of Rome "Niccolò Cusano", Italy, EU  
**Prof. Mario Monzón Verona**, Mechanical Engineering Department University of Las Palmas de Gran Canaria, Spain, EU

### DESCRIPTION

---

We are thrilled to devote a new Special Issue on Materials and Nanomaterials with cooperation of the Sciknowledge Team. **2022 International Conference on Materials and Nanomaterials (MNs-22)** is organized by academics and researchers belonging to different scientific areas of the University of Rome "Niccolò Cusano" di Roma, Universidad Carlos III de Madrid, the Universidad de Extremadura, the Universidad de Las Palmas de Gran Canaria, Ecole Nationale Supérieure d'Arts et Métiers de Paris, Liverpool Centre for Materials Technology, Firat University of Turkey and the Universidade Tecnica de Lisboa, with the technical support of Sciknowledge European Conferences.

Committee Members invite participants from across the globe to join in this annual flagship conference on Materials and Nanomaterials.

This event has the objective of creating an international forum for academics, researchers, and scientists from worldwide to discuss worldwide results and proposals regarding the soundest issues related to Materials and Nanomaterials.

### HOW TO SUBMIT

---

Chosen manuscripts by the Committee Members can be further considered for publication in one of the scientific journals by De Gruyter. The publication will be free of charge in the selected De Gruyter journals. Moreover, every participant will receive a 50% code for a single publication in the below journal:

**Main Group Metal Chemistry** (IF: 1.068)  
(<https://www.degruyter.com/journal/key/mgmc/html>)

**Reviews in Analytical Chemistry** (IF: 3.067)  
(<https://www.degruyter.com/journal/key/revac/html>)

**Reviews on Advanced Materials Science** (IF: 3.364)  
(<https://www.degruyter.com/journal/key/rams/html>)

**High Temperature Materials and Processes** (IF: 0.826)  
(<https://www.degruyter.com/journal/key/htmp/html>)

Please post the M&N2022 code in the cover letter to achieve a 50% discount.

We would like to highlight that all chosen manuscripts will undergo the standard peer-review process (single-blind, with at least two independent reviewers). When entering your submission via the online submission system please choose "Special Issue: M&N". Submission of a manuscript implies that the work described has not been published before and is not under consideration for publication anywhere else.

The deadline for submissions is **November 30st, 2022**, but individual papers will be reviewed and published online on an ongoing basis.

What is in it for you?

Your benefits due to contribution to this Special Issue:

- ▶ indexation in Web of Science, SCOPUS, and many other services
- ▶ convenient, web-based paper submission and tracking system – Editorial Manager
- ▶ quick online publication upon completing the publishing process (continuous publication model)
- ▶ better visibility due to Open Access
- ▶ long-term preservation of the content (articles archived in Portico)
- ▶ extensive post-publication promotion for selected papers

In case of any further questions please contact the Managing Editor:

[ewa.chmielewska@degruyter.com](mailto:ewa.chmielewska@degruyter.com)

**2nd International Conference**

**Materials & Nanomaterials**

**Rome**  
**25th - 27th July 2022**

 **UNIVERSITA  
NICCOLÒ CUSANO**

 **ACADEMIC  
CONFERENCE  
EXCELLENCE**  
*Certified Event*

**CONFERENCE JOURNALS**

**DE GRUYTER**

 **MDPI**

**Submit Abstract**   **Registration**   **Sponsorship Catalog**
